# Supplementary material
Source: HighWire-hosted journal article supplement (https://bmjopen.bmj.com/content/13/4/e062742)
Supplement: inline-supplementary-material-1 [file inline-supplementary-material-1.pdf]

**Supplementary Table 1.** ICES data linkage details and dataset justification.

| Dataset Name | Description                                                                                            | Purpose for study                        |
|--------------|--------------------------------------------------------------------------------------------------------|------------------------------------------|
| CPDB         | Corporate Provider Database - information on providers/groups eligible to receive payment from OHIP    | Cohort creation, cohort description      |
| IPDB         | ICES Physician Database - yearly information about all physicians in Ontario                           | Cohort creation, cohort description      |
| PCCF         | Postal Code Conversion File - converts any Canadian postal code to StatCan standard geographical areas | Cohort description, covariate definition |
| REF          | Reference Files – geographical information                                                             | Cohort description, covariate definition |
| DAD          | Discharge Abstract Database                                                                            | Outcome definition                       |
| NACRS        | National Ambulatory Reporting System                                                                   | Outcome definition                       |
| NRS          | National Rehabilitating Reporting System                                                               | Cohort description                       |
| ODB          | Ontario Drug Benefit                                                                                   | Cohort description, exposure definition  |
| OHIP         | Ontario Health Insurance Plan                                                                          | Cohort description                       |
| OMHRS        | Ontario Mental Health Reporting System                                                                 | Outcome definition                       |
| NMS          | Narcotics Monitoring System                                                                            | Outcome definition                       |
| CAPE         | Client Agency Program Enrolment – rostering to primary health services                                 | Cohort description                       |
| CENSUS       | Ontario Census Area Profiles                                                                           | Cohort description                       |
| RPDB         | Registered Persons Database – vital statistics                                                         | Cohort creation, cohort description      |

**Supplementary Table 2.** List of benzodiazepines used in analysis.

|            |
|------------|
| Alpraz     |
| Bromazepam |
| Clobazam   |
| Clonazepam |
| Diazepam   |
| Flurazepam |
| Lorazepam  |
| Oxazepam   |
| Ativan     |

|                  |
|------------------|
| Chlordiazepoxide |
| Diastat          |
| Alprazolam       |
| Librax           |
| Midazolam        |
| Mogadon          |
| Restoril         |
| Rivotril         |
| Temazepam        |
| Triazolam        |
| Xanax            |
